# Supplementary material
Source: Springer Nature journal article supplement (https://www.springermedizin.de/resource/supplementary/12974_2011_438_MOESM4_ESM.pdf/9601288)

(A)

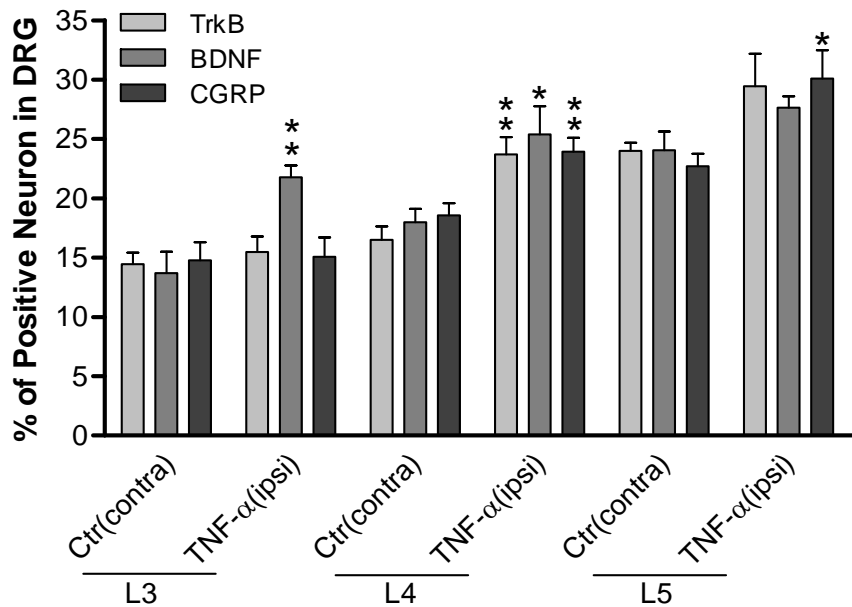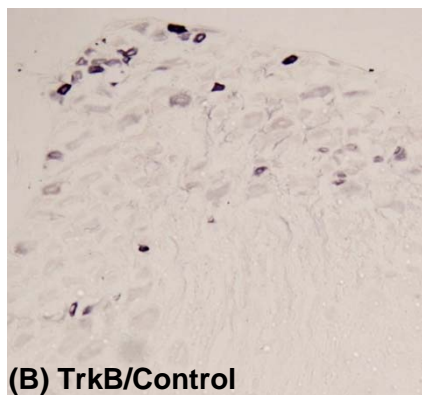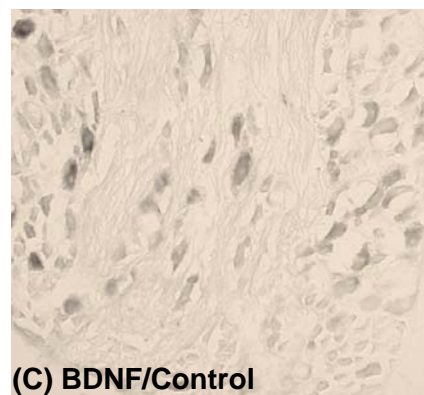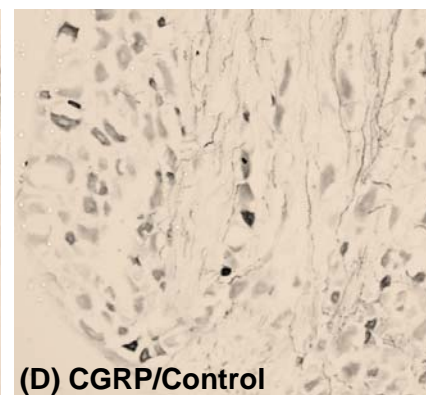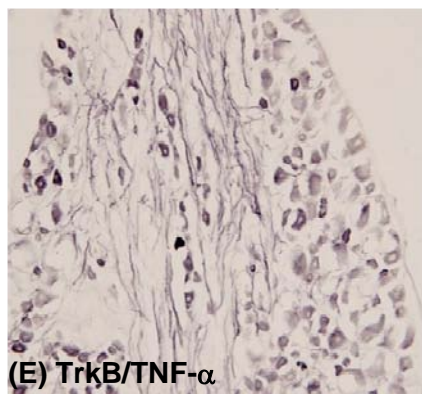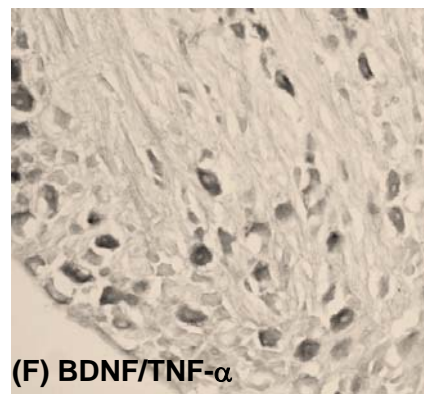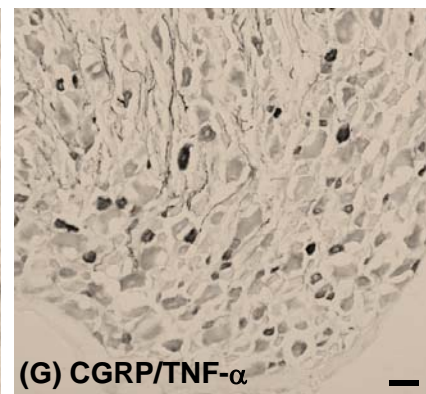

Supplement: MOESM4 [file 9601288]
